# Supplementary material for: Serum Metabolite Profile Associated with Sex-Dependent Visceral Adiposity Index and Low Bone Mineral Density in a Mexican Population
Source: MDPI journal article supplement (doi:10.3390/metabo11090604), 2021-09-06
Supplement: s1 [file s1]

**Table S2.** Clinical and demographic data categorized by age groups.

|                                                 | <30 years<br>n=31 | 30-<40 years<br>n=38 | 40-<50 years<br>n=70 | 50-<60 years<br>n=161 | 60-<70 years<br>n=178 | ≥70 years<br>n=124 | <i>p</i> -value ( <i>trend</i> ) |
|-------------------------------------------------|-------------------|----------------------|----------------------|-----------------------|-----------------------|--------------------|----------------------------------|
| BMI (kg/m <sup>2</sup> ) *                      | 24.9(22.9-31.6)   | 25.5(22.5-29.8)      | 27.1(24.6-30.5)      | 26.9(23.8-31.1)       | 27.1(24.6-30.1)       | 27.2(24.4-29.7)    | 0.182                            |
| <b>Nutritional Status, %</b>                    |                   |                      |                      |                       |                       |                    |                                  |
| Overweight                                      | 22.6              | 26.3                 | 44.3                 | 32.3                  | 42.7                  | 47.6               | 0.001                            |
| Obesity                                         | 25.8              | 23.7                 | 25.7                 | 32.9                  | 25.8                  | 24.2               | 0.204                            |
| Waist circumference (cm) *                      | 88(77-103)        | 90(80-96)            | 93(85-99)            | 92(86-101)            | 93(85-99)             | 95(89-100)         | 0.006                            |
| Body fat proportion *                           | 38.8(34.2-43.4)   | 42.2(36.9-48.1)      | 43.0(35.9-46.0)      | 41.5(34.1-47.6)       | 43.4(37.0-49.4)       | 44.3(38.6-46.7)    | 0.003                            |
| Leisure time physical activity (min/day) *      | 14.4(6.4-47.1)    | 11.2(1.4-25.7)       | 9.6(3.2-30.0)        | 12.9(3.2-30.0)        | 12.9(3.2-42.9)        | 8.6(3.2-30.0)      | 0.884                            |
| Active (≥150/week), %                           | 29.0              | 18.4                 | 24.3                 | 26.1                  | 34.3                  | 29.8               | 0.278                            |
| Missing, %                                      | 22.6              | 21.1                 | 18.6                 | 17.4                  | 11.8                  | 14.5               | -                                |
| Glucose (mg/dL)                                 | 90(85-96)         | 91(86-98)            | 95(90-104)           | 100(93-109)           | 100(95-114)           | 102(93-112)        | <0.001                           |
| Impaired Glucose tolerance (≥100-<126 mg/dL), % | 19.4              | 21.1                 | 24.3                 | 31.7                  | 36.5                  | 37.0               | <0.001                           |
| Type 2 diabetes, %                              | -                 | 2.6                  | 12.9                 | 21.7                  | 19.1                  | 25.0               | <0.001                           |
| Total cholesterol (mg/dL) *                     | 179.6(85.6-280.8) | 170(110.5-247.7)     | 134.0(90.3-209.1)    | 133.7(81.7-204.3)     | 118.8(80.5-178.5)     | 120.9(73.6-195.0)  | 0.001                            |
| Triglyceride (mg/dL) *                          | 104(73-190)       | 108(83-155)          | 141(106-198)         | 143(106-197)          | 150(114-203)          | 140(112-201)       | 0.002                            |
| HDL-C(mg/dL) *                                  | 46.7(39.1-54.4)   | 52.8(43.8-61.9)      | 47.2(38.7-56.1)      | 50.8(43.5-59.4)       | 51.6(43.2-59.8)       | 52.1(44.2-65.2)    | 0.012                            |
| LDL-C(mg/dL) *                                  | 94.4(80.0-110.9)  | 109.8(80.3-124.8)    | 113.3(86.1-132.4)    | 114.0(93.7-137.8)     | 118.3(95.5-139.0)     | 111.1(88.4-135.5)  | 0.015                            |
| Systolic blood pressure (mmHg) *                | 109(106-116)      | 108(102-115)         | 115(107-124)         | 117(108-127)          | 124(112-138)          | 132(119-147)       | <0.001                           |
| Diastolic blood pressure (mmHg) *               | 71(65-80)         | 73(67-78)            | 77(71-84)            | 77(71-84)             | 76(69-82)             | 74(68-80)          | 0.937                            |
| Femoral neck- BMD (g/cm <sup>2</sup> ) *        | 1.12(1.02-1.25)   | 1.02(0.94-1.08)      | 1.01(0.92-1.11)      | 0.94(0.87-1.01)       | 0.87(0.78-0.95)       | 0.80(0.71-0.88)    | <0.001                           |
| Lumbar spine- BMD (g/cm <sup>2</sup> ) *        | 1.22(1.12-1.25)   | 1.19(1.11-1.27)      | 1.16(1.07-1.27)      | 1.07(0.97-1.14)       | 1.01(0.90-1.12)       | 1.01(0.87-1.15)    | <0.001                           |
| Visceral Adiposity Index                        | 1.8(1.1-3.1)      | 1.6(1.1-2.5)         | 2.2(1.6-3.8)         | 2.2(1.5-3.5)          | 2.3(1.7-3.4)          | 2.3(1.5-3.6)       | 0.009                            |

\* Median (P25-P75).
