# Supplementary material for: Serum Metabolite Profile Associated with Sex-Dependent Visceral Adiposity Index and Low Bone Mineral Density in a Mexican Population
Source: MDPI journal article supplement (doi:10.3390/metabo11090604), 2021-09-06
Supplement: s1 [file s1]

**Table S1.** Demographics categorized by sex and bone mineral density status of individuals belonging to the Health Workers Cohort Study.

|                                                 | Total               |                  |         | Men                 |                 |         | Women               |                  |         |
|-------------------------------------------------|---------------------|------------------|---------|---------------------|-----------------|---------|---------------------|------------------|---------|
|                                                 | Normal-BMD<br>n=396 | Low-BMD<br>n=206 | p-Value | Normal-BMD<br>n=115 | Low-BMD<br>n=30 | p-Value | Normal-BMD<br>n=281 | Low-BMD<br>n=176 | p-Value |
| Age(years)*                                     | 56(46-63)           | 67(59-73)        | <0.001  | 55(44-62)           | 62(54-69)       | 0.006   | 57(48-63)           | 68(60-74)        | <0.001  |
| Age categories, %                               |                     |                  |         |                     |                 |         |                     |                  |         |
| <30 years                                       | 7.1                 | 1.5              | 0.003   | 10.4                | 0               | 0.065   | 5.7                 | 1.7              | 0.037   |
| 30-39 years                                     | 8.3                 | 2.4              | 0.005   | 7                   | 0               | 0.136   | 8.9                 | 2.8              | 0.01    |
| 40-49 years                                     | 14.7                | 5.8              | 0.001   | 16.5                | 13.3            | 0.669   | 13.9                | 4.6              | 0.002   |
| 50-59 years                                     | 32.1                | 16.5             | <0.001  | 30.4                | 26.7            | 0.0693  | 32.7                | 14.8             | <0.001  |
| 60-69 years                                     | 25.8                | 36.9             | 0.005   | 20.9                | 36.7            | 0.072   | 27.8                | 36.9             | 0.041   |
| >70 years                                       | 12.1                | 36.9             | <0.001  | 14.8                | 23.3            | 0.265   | 11                  | 39.2             | <0.001  |
| BMI (kg/m <sup>2</sup> )*                       | 27.8(24.8-31.7)     | 25.2(23.0-27.8)  | <0.001  | 27.1(24.5-30.4)     | 24.9(22.8-26.9) | 0.0021  | 28.3(24.9-32.2)     | 25.6(23.0-28.0)  | <0.001  |
| Nutritional Status, %                           |                     |                  |         |                     |                 |         |                     |                  |         |
| Overweight                                      | 38.9                | 39.3             | 0.924   | 41.7                | 40              | 0.866   | 37.7                | 39.2             | 0.748   |
| Obesity                                         | 34.6                | 13.1             | <0.001  | 28.7                | 6.7             | 0.012   | 37                  | 14.2             | <0.001  |
| Waist circumference (cm) *                      | 94(87-102)          | 89(83-97)        | <0.001  | 98(92-106)          | 92(89-100)      | 0.018   | 93(85-101)          | 88(82-96)        | 0.0001  |
| Body fat proportion*                            | 43.2(36.3-49.2)     | 42.4(36.5-46.7)  | 0.178   | 33.1(29.3-36.9)     | 30.7(28.0-35.0) | 0.128   | 46.4(41.6-50.6)     | 43.4(39.4-47.2)  | 0.0004  |
| Leisure time physical activity (min/day) *      | 12.9(3.2-30.0)      | 12.9(3.2-30.0)   | 0.603   | 12.9(3.2-47.1)      | 16.0(4.8-36.4)  | 0.728   | 12.8(3.2-30.0)      | 12.8(2.3-30.0)   | 0.869   |
| Active (≥150/week), %                           | 27                  | 32               | 0.198   | 31.3                | 36.7            | 0.574   | 25.3                | 31.3             | 0.163   |
| Missing, %                                      | 17.9                | 12.6             | -       | 17.4                | 6.7             | -       | 17.4                | 13.6             | -       |
| Glucose (mg/dL)                                 | 100(91-112)         | 98(92-107)       | 0.12    | 101(92-110)         | 101(94-109)     | 0.817   | 100(91-112)         | 97(91-106)       | 0.12    |
| Impaired Glucose tolerance (≥100-<126 mg/dL), % | 33.3                | 29.6             | 0.356   | 36.5                | 33.3            | 0.745   | 32                  | 29               | 0.499   |
| Type 2 diabetes, %                              | 20.2                | 14.6             | 0.092   | 20.9                | 20              | -       | 19.9                | 13.6             | -       |

|                                          |                   |                   |        |                   |                   |        |                   |                   |        |
|------------------------------------------|-------------------|-------------------|--------|-------------------|-------------------|--------|-------------------|-------------------|--------|
| Total cholesterol (mg/dL) *              | 197(165-222)      | 199.5(176-228)    | 0.134  | 193(160-219)      | 200(181-224)      | 0.296  | 198(170-225)      | 200(176-230)      | 0.373  |
| Triglyceride (mg/dL) *                   | 143(106-197)      | 206(105-194)      | 0.494  | 146(106-206)      | 155(106-212)      | 0.676  | 140(106-197)      | 136(105-189)      | 0.474  |
| HDL-C(mg/dL) *                           | 49.5(40.8-57.8)   | 53.1(45.8-65.1)   | 0.0001 | 43.8(38.1-53.0)   | 45.5(41.6-52.2)   | 0.293  | 51.8(43.4-60.0)   | 54.1(46.9-67.1)   | 0.003  |
| LDL-C(mg/dL) *                           | 112.0(89.3-135.9) | 113.5(92.1-135.6) | 0.378  | 110.9(84.9-135.6) | 122.0(93.7-139.9) | 0.232  | 112.7(91.6-136.3) | 113.1(91.7-135.3) | 0.715  |
| Systolic blood pressure (mmHg) *         | 119(109-131)      | 120(108-138)      | 0.423  | 123(114-137)      | 122(112-140)      | 0.659  | 116(107-130)      | 120(108-137)      | 0.1    |
| Diastolic blood pressure (mmHg) *        | 76(71-82.5)       | 74(67-80)         | 0.001  | 79(73-85)         | 77(72-87)         | 0.445  | 75(69-81)         | 74(67-79)         | 0.019  |
| Femoral neck- BMD (g/cm <sup>2</sup> )*  | 0.98(0.89-1.05)   | 0.77(0.71-0.82)   | <0.001 | 1.03(0.96-1.17)   | 0.83(0.78-0.88)   | <0.001 | 0.96(0.88-1.03)   | 0.76(0.71-0.81)   | <0.001 |
| Lumbar spine- BMD (g/cm <sup>2</sup> ) * | 1.12(1.02-1.23)   | 0.95(0.85-1.04)   | <0.001 | 1.18(1.10-1.30)   | 1.02(0.95-1.08)   | <0.001 | 1.11(1.01-1.19)   | 0.92(0.84-1.03)   | <0.001 |
| Visceral Adiposity Index                 | 2.2(1.5-3.5)      | 2.2(1.4-3.2)      | 0.293  | 2.0(1.4-3.3)      | 2.0(1.5-2.9)      | 0.781  | 2.3(1.6-3.6)      | 2.2(1.4-3.3)      | 0.113  |

\* Median (P25-P75).
